# Supplementary material for: Second harmonic generation and crystal structure of a self-assembled Boc- p -nitro- l -phenylalanyl- p -nitro- l -phenylalanine dipeptide
Source: Royal Society of Chemistry journal article supplement (doi:10.1039/d5ce00134j), 2025-01-01
Supplement: d5ce00134j1.pdf [file d5ce00134j1.pdf]

## Supplementary Information

# Second harmonic generation and crystal structure of self-assembled Boc-*p*-nitro-L-phenylalanyl-*p*-nitro-L-phenylalanine dipeptide

Rosa M. F. Baptista,<sup>\*a</sup> Alejandro P. Ayala,<sup>b</sup> Etelvina de Matos Gomes,<sup>a</sup> M. Cidália R. Castro,<sup>c</sup> Ana V. Machado <sup>c</sup> and Michael S. Belsley <sup>a</sup>

<sup>a)</sup> Centre of Physics of Minho and Porto Universities (CF-UM-UP), Laboratory of Physics for Materials and Emergent Technologies (LaPMET), University of Minho, Campus de Gualtar, 4710-057 Braga, Portugal

<sup>b)</sup> Departamento de Física, Universidade Federal do Ceará, Fortaleza, CE 65455-900, Brazil

<sup>c)</sup> Institute for Polymers and Composites, University of Minho, Campus de Azurém, 4800-058 Guimarães, Portugal.

### S1 . Single-crystal X-ray diffraction crystal structure tables

**Table S1.1** Atomic coordinates and  $U_{eq}$  [Å<sup>2</sup>] for Boc-*p*NPhe*p*NPhe.

| Atom | x            | y         | z           | $U_{eq}$   |
|------|--------------|-----------|-------------|------------|
| O1   | 0.29118(15)  | 0.5831(3) | 0.45292(10) | 0.0252(4)  |
| O2   | 0.37260(16)  | 0.8917(4) | 0.38431(11) | 0.0298(4)  |
| O3   | 0.37792(15)  | 0.2247(3) | 0.21525(10) | 0.0259(4)  |
| O4   | 0.49283(15)  | 0.7858(5) | 0.08697(10) | 0.0372(5)  |
| O5   | 0.35706(16)  | 0.7681(6) | 0.01009(11) | 0.0465(7)  |
| H5   | 0.404644     | 0.816463  | -0.018434   | 0.070      |
| O6   | 0.87785(19)  | 0.7354(6) | 0.06213(14) | 0.0575(8)  |
| O7   | 0.8296(3)    | 0.3680(6) | 0.01567(16) | 0.0811(11) |
| O8   | -0.12641(18) | 0.0447(5) | 0.28441(12) | 0.0460(6)  |
| O9   | -0.03620(17) | 0.1813(5) | 0.37528(10) | 0.0379(5)  |
| N1   | 0.39756(17)  | 0.4582(4) | 0.36550(11) | 0.0224(5)  |
| H1   | 0.384796     | 0.298442  | 0.380706    | 0.027      |
| N2   | 0.37257(16)  | 0.6625(4) | 0.19896(11) | 0.0204(4)  |
| H2   | 0.386340     | 0.816099  | 0.218140    | 0.024      |
| N3   | 0.8283(2)    | 0.5295(7) | 0.06325(17) | 0.0485(8)  |
| N4   | -0.05570(18) | 0.1776(5) | 0.31124(12) | 0.0280(5)  |
| C1   | 0.7612(2)    | 0.4733(7) | 0.12613(16) | 0.0343(7)  |
| C2   | 0.7696(2)    | 0.6325(6) | 0.18448(16) | 0.0334(7)  |
| H2A  | 0.817491     | 0.776765  | 0.184830    | 0.040      |
| C3   | 0.7065(2)    | 0.5782(6) | 0.24312(16) | 0.0289(6)  |
| H3   | 0.711642     | 0.686578  | 0.284162    | 0.035      |
| C4   | 0.6358(2)    | 0.3679(5) | 0.24298(14) | 0.0224(5)  |
| C5   | 0.6300(2)    | 0.2087(6) | 0.18293(15) | 0.0290(6)  |
| H5A  | 0.582304     | 0.063891  | 0.182108    | 0.035      |
| C6   | 0.6935(3)    | 0.2604(6) | 0.12415(16) | 0.0368(7)  |
| H6   | 0.690462     | 0.150867  | 0.083271    | 0.044      |
| C7   | 0.5639(2)    | 0.3199(5) | 0.30610(13) | 0.0222(5)  |
| H7A  | 0.604561     | 0.352917  | 0.350753    | 0.027      |
| H7B  | 0.540891     | 0.134667  | 0.306182    | 0.027      |

|      |             |           |             |           |
|------|-------------|-----------|-------------|-----------|
| C8   | 0.4646(2)   | 0.4977(5) | 0.30378(13) | 0.0196(5) |
| H8   | 0.489159    | 0.683792  | 0.303593    | 0.024     |
| C9   | 0.40108(19) | 0.4471(5) | 0.23504(13) | 0.0199(5) |
| C10  | 0.32030(19) | 0.6543(5) | 0.13007(13) | 0.0212(5) |
| H10  | 0.305096    | 0.466103  | 0.119592    | 0.025     |
| C11  | 0.3976(2)   | 0.7487(5) | 0.07316(14) | 0.0232(5) |
| C12  | 0.2116(2)   | 0.7964(5) | 0.12995(14) | 0.0230(5) |
| H12A | 0.220658    | 0.977401  | 0.147748    | 0.028     |
| H12B | 0.182145    | 0.804591  | 0.080809    | 0.028     |
| C13  | 0.1360(2)   | 0.6480(5) | 0.17747(14) | 0.0222(5) |
| C14  | 0.0719(2)   | 0.4507(6) | 0.14841(14) | 0.0233(5) |
| H14  | 0.072250    | 0.421599  | 0.098378    | 0.028     |
| C15  | 0.0076(2)   | 0.2960(5) | 0.19155(14) | 0.0246(6) |
| H15  | -0.036594   | 0.162922  | 0.171700    | 0.030     |
| C16  | 0.0100(2)   | 0.3422(5) | 0.26448(14) | 0.0230(5) |
| C17  | 0.0717(2)   | 0.5360(5) | 0.29483(15) | 0.0273(6) |
| H17  | 0.071649    | 0.562887  | 0.344964    | 0.033     |
| C18  | 0.1338(2)   | 0.6912(5) | 0.25097(14) | 0.0263(6) |
| H18  | 0.175401    | 0.828491  | 0.271122    | 0.032     |
| C19  | 0.3544(2)   | 0.6646(5) | 0.39997(13) | 0.0224(5) |
| C20  | 0.2418(2)   | 0.7751(5) | 0.50235(13) | 0.0244(6) |
| C21  | 0.1658(2)   | 0.9539(6) | 0.46193(15) | 0.0293(6) |
| H21A | 0.207106    | 1.075033  | 0.432419    | 0.044     |
| H21B | 0.122692    | 1.053376  | 0.495894    | 0.044     |
| H21C | 0.118581    | 0.848750  | 0.431349    | 0.044     |
| C22  | 0.3291(2)   | 0.9193(6) | 0.54284(16) | 0.0312(6) |
| H22A | 0.381301    | 0.793266  | 0.561588    | 0.047     |
| H22B | 0.297403    | 1.016526  | 0.582465    | 0.047     |
| H22C | 0.365052    | 1.041553  | 0.510674    | 0.047     |
| C23  | 0.1790(3)   | 0.6009(6) | 0.55246(16) | 0.0322(7) |
| H23A | 0.123051    | 0.508757  | 0.525533    | 0.048     |
| H23B | 0.146074    | 0.708331  | 0.589592    | 0.048     |
| H23C | 0.227462    | 0.473278  | 0.574631    | 0.048     |

$U_{eq}$  is defined as 1/3 of the trace of the orthogonalized  $U_{ij}$  tensor.

**Table S1.2** Anisotropic displacement parameters [ $\text{\AA}^2$ ] for Boc-*p*NPhepNPhe. The anisotropic displacement factor exponent takes the form:  $-2\pi^2 [ h^2(a^*)^2U_{11} + k^2(b^*)^2U_{22} + \dots + 2hka^*b^*U_{12} ]$

| Atom | $U_{11}$   | $U_{22}$   | $U_{33}$   | $U_{23}$    | $U_{13}$   | $U_{12}$    |
|------|------------|------------|------------|-------------|------------|-------------|
| O1   | 0.0342(10) | 0.0143(9)  | 0.0273(10) | -0.0018(7)  | 0.0095(8)  | -0.0004(7)  |
| O2   | 0.0384(11) | 0.0162(9)  | 0.0350(11) | 0.0006(8)   | 0.0112(8)  | -0.0010(8)  |
| O3   | 0.0319(10) | 0.0152(9)  | 0.0306(10) | 0.0000(7)   | -0.0049(8) | -0.0018(7)  |
| O4   | 0.0224(10) | 0.0580(15) | 0.0314(10) | -0.0118(10) | 0.0057(8)  | -0.0088(10) |
| O5   | 0.0241(10) | 0.087(2)   | 0.0285(11) | 0.0211(12)  | 0.0049(8)  | 0.0037(11)  |
| O6   | 0.0358(12) | 0.083(2)   | 0.0543(15) | 0.0355(15)  | 0.0094(11) | -0.0002(14) |
| O7   | 0.127(3)   | 0.0598(19) | 0.0574(17) | 0.0133(15)  | 0.0561(18) | 0.0343(19)  |
| O8   | 0.0393(12) | 0.0543(15) | 0.0446(13) | 0.0103(11)  | 0.0003(10) | -0.0248(11) |
| O9   | 0.0444(12) | 0.0422(13) | 0.0271(11) | 0.0060(9)   | 0.0083(9)  | -0.0003(11) |
| N1   | 0.0304(12) | 0.0134(10) | 0.0235(11) | 0.0017(9)   | 0.0054(9)  | -0.0006(9)  |
| N2   | 0.0238(11) | 0.0142(10) | 0.0232(11) | -0.0004(8)  | 0.0007(8)  | -0.0002(8)  |
| N3   | 0.0429(17) | 0.059(2)   | 0.0443(17) | 0.0198(15)  | 0.0162(13) | 0.0248(15)  |

|     |            |            |            |             |             |             |
|-----|------------|------------|------------|-------------|-------------|-------------|
| N4  | 0.0253(12) | 0.0272(12) | 0.0316(13) | 0.0038(10)  | 0.0065(9)   | 0.0042(10)  |
| C1  | 0.0300(15) | 0.0387(17) | 0.0343(15) | 0.0122(14)  | 0.0113(12)  | 0.0133(13)  |
| C2  | 0.0268(14) | 0.0316(16) | 0.0419(17) | 0.0100(13)  | 0.0048(12)  | 0.0008(12)  |
| C3  | 0.0258(14) | 0.0296(15) | 0.0313(15) | 0.0026(12)  | 0.0013(11)  | 0.0001(11)  |
| C4  | 0.0196(12) | 0.0202(13) | 0.0272(13) | 0.0029(10)  | -0.0006(10) | 0.0050(10)  |
| C5  | 0.0314(14) | 0.0255(14) | 0.0301(14) | -0.0019(11) | 0.0026(11)  | 0.0029(12)  |
| C6  | 0.0434(17) | 0.0386(18) | 0.0285(14) | -0.0038(13) | 0.0050(12)  | 0.0130(14)  |
| C7  | 0.0260(13) | 0.0186(12) | 0.0222(12) | 0.0024(10)  | 0.0002(10)  | -0.0005(10) |
| C8  | 0.0234(12) | 0.0146(12) | 0.0209(12) | 0.0009(9)   | 0.0020(10)  | -0.0005(9)  |
| C9  | 0.0186(12) | 0.0177(12) | 0.0234(12) | -0.0002(10) | 0.0062(10)  | 0.0014(10)  |
| C10 | 0.0209(12) | 0.0189(12) | 0.0238(13) | 0.0011(10)  | -0.0008(10) | -0.0013(10) |
| C11 | 0.0229(13) | 0.0214(13) | 0.0254(13) | -0.0002(10) | 0.0011(10)  | 0.0015(10)  |
| C12 | 0.0235(13) | 0.0187(13) | 0.0268(13) | 0.0032(10)  | 0.0005(10)  | 0.0012(10)  |
| C13 | 0.0198(12) | 0.0210(13) | 0.0260(13) | 0.0021(11)  | 0.0020(10)  | 0.0032(10)  |
| C14 | 0.0212(12) | 0.0263(13) | 0.0225(13) | -0.0012(11) | 0.0027(10)  | 0.0014(11)  |
| C15 | 0.0201(12) | 0.0254(14) | 0.0285(14) | -0.0002(11) | -0.0005(10) | -0.0021(11) |
| C16 | 0.0201(12) | 0.0231(13) | 0.0260(13) | 0.0027(11)  | 0.0056(10)  | 0.0025(10)  |
| C17 | 0.0313(14) | 0.0279(14) | 0.0227(13) | -0.0028(11) | 0.0052(11)  | -0.0006(12) |
| C18 | 0.0273(14) | 0.0217(13) | 0.0298(14) | -0.0052(11) | 0.0011(11)  | -0.0023(11) |
| C19 | 0.0258(13) | 0.0184(12) | 0.0231(13) | -0.0001(10) | 0.0015(10)  | -0.0004(10) |
| C20 | 0.0312(14) | 0.0187(13) | 0.0234(13) | -0.0045(10) | 0.0065(11)  | 0.0027(11)  |
| C21 | 0.0321(14) | 0.0247(13) | 0.0311(14) | -0.0064(12) | 0.0017(11)  | 0.0032(12)  |
| C22 | 0.0359(15) | 0.0257(15) | 0.0318(15) | -0.0059(12) | -0.0010(12) | 0.0014(12)  |
| C23 | 0.0428(17) | 0.0230(14) | 0.0311(14) | -0.0038(11) | 0.0127(13)  | 0.0003(12)  |

**Table S1.3.** Bond lengths and angles for Boc-*p*NPhe*p*NPhe.

| Atom–Atom | Length [Å] |
|-----------|------------|
| O1–C19    | 1.340(3)   |
| O1–C20    | 1.487(3)   |
| O2–C19    | 1.219(3)   |
| O3–C9     | 1.230(3)   |
| O4–C11    | 1.230(3)   |
| O5–H5     | 0.8400     |
| O5–C11    | 1.286(3)   |
| O6–N3     | 1.222(4)   |
| O7–N3     | 1.216(5)   |
| O8–N4     | 1.220(3)   |
| O9–N4     | 1.224(3)   |
| N1–H1     | 0.8800     |
| N1–C8     | 1.448(3)   |
| N1–C19    | 1.352(3)   |
| N2–H2     | 0.8800     |
| N2–C9     | 1.339(3)   |
| N2–C10    | 1.443(3)   |
| N3–C1     | 1.481(4)   |
| N4–C16    | 1.470(3)   |
| C1–C2     | 1.367(5)   |
| C1–C6     | 1.378(5)   |
| C2–H2A    | 0.9500     |

|          |          |
|----------|----------|
| C2-C3    | 1.386(4) |
| C3-H3    | 0.9500   |
| C3-C4    | 1.391(4) |
| C4-C5    | 1.391(4) |
| C4-C7    | 1.511(3) |
| C5-H5A   | 0.9500   |
| C5-C6    | 1.389(4) |
| C6-H6    | 0.9500   |
| C7-H7A   | 0.9900   |
| C7-H7B   | 0.9900   |
| C7-C8    | 1.538(3) |
| C8-H8    | 1.0000   |
| C8-C9    | 1.530(3) |
| C10-H10  | 1.0000   |
| C10-C11  | 1.523(4) |
| C10-C12  | 1.540(3) |
| C12-H12A | 0.9900   |
| C12-H12B | 0.9900   |
| C12-C13  | 1.508(3) |
| C13-C14  | 1.395(4) |
| C13-C18  | 1.396(4) |
| C14-H14  | 0.9500   |
| C14-C15  | 1.392(4) |
| C15-H15  | 0.9500   |
| C15-C16  | 1.388(4) |
| C16-C17  | 1.375(4) |
| C17-H17  | 0.9500   |
| C17-C18  | 1.385(4) |
| C18-H18  | 0.9500   |
| C20-C21  | 1.516(4) |
| C20-C22  | 1.515(4) |
| C20-C23  | 1.518(4) |
| C21-H21A | 0.9800   |
| C21-H21B | 0.9800   |
| C21-H21C | 0.9800   |
| C22-H22A | 0.9800   |
| C22-H22B | 0.9800   |
| C22-H22C | 0.9800   |
| C23-H23A | 0.9800   |
| C23-H23B | 0.9800   |
| C23-H23C | 0.9800   |
|          |          |

| Atom-Atom-Atom | Angle [°] |
|----------------|-----------|
| C19-O1-C20     | 120.4(2)  |
| C11-O5-H5      | 109.5     |
| C8-N1-H1       | 119.7     |
| C19-N1-H1      | 119.7     |
| C19-N1-C8      | 120.6(2)  |
| C9-N2-H2       | 118.5     |
| C9-N2-C10      | 123.0(2)  |
| C10-N2-H2      | 118.5     |
| O6-N3-C1       | 118.1(3)  |
| O7-N3-O6       | 124.3(3)  |
| O7-N3-C1       | 117.6(3)  |
| O8-N4-O9       | 123.5(2)  |
| O8-N4-C16      | 118.6(2)  |
| O9-N4-C16      | 118.0(2)  |
| C2-C1-N3       | 118.8(3)  |
| C2-C1-C6       | 122.3(3)  |
| C6-C1-N3       | 118.9(3)  |
| C1-C2-H2A      | 120.8     |
| C1-C2-C3       | 118.4(3)  |
| C3-C2-H2A      | 120.8     |
| C2-C3-H3       | 119.4     |
| C2-C3-C4       | 121.2(3)  |
| C4-C3-H3       | 119.4     |
| C3-C4-C7       | 120.3(2)  |
| C5-C4-C3       | 118.9(2)  |
| C5-C4-C7       | 120.8(2)  |
| C4-C5-H5A      | 119.9     |
| C6-C5-C4       | 120.3(3)  |
| C6-C5-H5A      | 119.9     |
| C1-C6-C5       | 118.9(3)  |
| C1-C6-H6       | 120.5     |
| C5-C6-H6       | 120.5     |
| C4-C7-H7A      | 109.3     |
| C4-C7-H7B      | 109.3     |
| C4-C7-C8       | 111.5(2)  |
| H7A-C7-H7B     | 108.0     |
| C8-C7-H7A      | 109.3     |
| C8-C7-H7B      | 109.3     |
| N1-C8-C7       | 111.5(2)  |
| N1-C8-H8       | 108.4     |
| N1-C8-C9       | 110.5(2)  |
| C7-C8-H8       | 108.4     |
| C9-C8-C7       | 109.7(2)  |
| C9-C8-H8       | 108.4     |
| O3-C9-N2       | 123.2(2)  |
| O3-C9-C8       | 122.0(2)  |
| N2-C9-C8       | 114.9(2)  |
| N2-C10-H10     | 106.7     |
| N2-C10-C11     | 109.5(2)  |
| N2-C10-C12     | 112.3(2)  |
| C11-C10-H10    | 106.7     |
| C11-C10-C12    | 114.4(2)  |

|               |          |
|---------------|----------|
| C12-C10-H10   | 106.7    |
| O4-C11-O5     | 123.6(2) |
| O4-C11-C10    | 121.2(2) |
| O5-C11-C10    | 115.0(2) |
| C10-C12-H12A  | 110.0    |
| C10-C12-H12B  | 110.0    |
| H12A-C12-H12B | 108.4    |
| C13-C12-C10   | 108.5(2) |
| C13-C12-H12A  | 110.0    |
| C13-C12-H12B  | 110.0    |
| C14-C13-C12   | 119.5(2) |
| C14-C13-C18   | 118.9(2) |
| C18-C13-C12   | 121.4(2) |
| C13-C14-H14   | 119.5    |
| C15-C14-C13   | 121.1(2) |
| C15-C14-H14   | 119.5    |
| C14-C15-H15   | 121.0    |
| C16-C15-C14   | 117.9(2) |
| C16-C15-H15   | 121.0    |
| C15-C16-N4    | 118.9(2) |
| C17-C16-N4    | 118.6(2) |
| C17-C16-C15   | 122.5(2) |
| C16-C17-H17   | 120.6    |
| C16-C17-C18   | 118.8(2) |
| C18-C17-H17   | 120.6    |
| C13-C18-H18   | 119.6    |
| C17-C18-C13   | 120.7(2) |
| C17-C18-H18   | 119.6    |
| O1-C19-N1     | 110.5(2) |
| O2-C19-O1     | 125.9(2) |
| O2-C19-N1     | 123.6(2) |
| O1-C20-C21    | 110.3(2) |
| O1-C20-C22    | 109.5(2) |
| O1-C20-C23    | 102.6(2) |
| C21-C20-C23   | 109.8(2) |
| C22-C20-C21   | 113.7(2) |
| C22-C20-C23   | 110.4(2) |
| C20-C21-H21A  | 109.5    |
| C20-C21-H21B  | 109.5    |
| C20-C21-H21C  | 109.5    |
| H21A-C21-H21B | 109.5    |
| H21A-C21-H21C | 109.5    |
| H21B-C21-H21C | 109.5    |
| C20-C22-H22A  | 109.5    |
| C20-C22-H22B  | 109.5    |
| C20-C22-H22C  | 109.5    |
| H22A-C22-H22B | 109.5    |
| H22A-C22-H22C | 109.5    |
| H22B-C22-H22C | 109.5    |
| C20-C23-H23A  | 109.5    |
| C20-C23-H23B  | 109.5    |
| C20-C23-H23C  | 109.5    |
| H23A-C23-H23B | 109.5    |
| H23A-C23-H23C | 109.5    |
| H23B-C23-H23C | 109.5    |

**Table S1.4.** Torsion angles for Boc-*p*NPhepNPhe.

| Atom–Atom–Atom–Atom | Torsion Angle [°] |
|---------------------|-------------------|
| O6–N3–C1–C2         | –9.7(4)           |
| O6–N3–C1–C6         | 171.2(3)          |
| O7–N3–C1–C2         | 171.0(3)          |
| O7–N3–C1–C6         | –8.1(4)           |
| O8–N4–C16–C15       | –15.3(4)          |
| O8–N4–C16–C17       | 164.9(3)          |
| O9–N4–C16–C15       | 164.6(2)          |
| O9–N4–C16–C17       | –15.2(4)          |
| N1–C8–C9–O3         | –74.7(3)          |
| N1–C8–C9–N2         | 104.9(2)          |
| N2–C10–C11–O4       | 9.4(4)            |
| N2–C10–C11–O5       | –175.1(2)         |
| N2–C10–C12–C13      | –66.2(3)          |
| N3–C1–C2–C3         | –179.9(3)         |
| N3–C1–C6–C5         | –179.5(3)         |
| N4–C16–C17–C18      | 179.9(2)          |
| C1–C2–C3–C4         | –0.3(4)           |
| C2–C1–C6–C5         | 1.4(4)            |
| C2–C3–C4–C5         | 0.8(4)            |
| C2–C3–C4–C7         | –177.1(2)         |
| C3–C4–C5–C6         | –0.3(4)           |
| C3–C4–C7–C8         | 80.7(3)           |
| C4–C5–C6–C1         | –0.8(4)           |
| C4–C7–C8–N1         | –178.0(2)         |
| C4–C7–C8–C9         | 59.2(3)           |
| C5–C4–C7–C8         | –97.1(3)          |
| C6–C1–C2–C3         | –0.9(4)           |
| C7–C4–C5–C6         | 177.6(3)          |
| C7–C8–C9–O3         | 48.6(3)           |
| C7–C8–C9–N2         | –131.8(2)         |
| C8–N1–C19–O1        | 176.8(2)          |
| C8–N1–C19–O2        | –3.7(4)           |
| C9–N2–C10–C11       | –109.6(3)         |
| C9–N2–C10–C12       | 122.1(2)          |
| C10–N2–C9–O3        | –5.8(4)           |
| C10–N2–C9–C8        | 174.7(2)          |
| C10–C12–C13–C14     | –90.4(3)          |
| C10–C12–C13–C18     | 85.2(3)           |
| C11–C10–C12–C13     | 168.2(2)          |
| C12–C10–C11–O4      | 136.5(3)          |
| C12–C10–C11–O5      | –48.0(3)          |
| C12–C13–C14–C15     | 174.9(2)          |
| C12–C13–C18–C17     | –173.6(2)         |
| C13–C14–C15–C16     | –0.7(4)           |
| C14–C13–C18–C17     | 1.9(4)            |
| C14–C15–C16–N4      | –178.8(2)         |
| C14–C15–C16–C17     | 1.1(4)            |
| C15–C16–C17–C18     | 0.0(4)            |
| C16–C17–C18–C13     | –1.6(4)           |
| C18–C13–C14–C15     | –0.8(4)           |
| C19–O1–C20–C21      | 63.3(3)           |
| C19–O1–C20–C22      | –62.5(3)          |

|                |           |
|----------------|-----------|
| C19-N1-C8-C7   | 137.0(2)  |
| C19-N1-C8-C9   | -100.8(3) |
| C20-O1-C19-O2  | -4.5(4)   |
| C20-O1-C19-N1  | 174.9(2)  |
| C19-O1-C20-C23 | -179.8(2) |



## S2. Estimating the effective second-order nonlinear susceptibility

To estimate the effective second-order nonlinear susceptibility,  $d_{eff}$ , of the Boc-*p*NPhe*p*NPhe crystals we calibrated the efficiency of our second harmonic generation microscope using the second harmonic signal generated from a 1 mm thick orientated beta barium borate (BBO) crystal.

Accounting for both spatial walk-off and temporal dephasing from group velocity mismatch, Wang and Weiner<sup>1</sup> estimated the efficiency of generating second harmonic light using ultra-short pulses as:

$$\epsilon = \frac{U_{2\omega}}{U_{\omega}} = \frac{4\omega^2 d_{eff}^2}{n_{\omega} n_{2\omega} \lambda_0 \epsilon_0 c^3} \sqrt{2 \ln 2} \frac{U_{\omega}}{t_p} \ell_{st} \tan^{-1} \left( \frac{L}{2z_R} \right) \quad (\text{S.1})$$

Here  $U_{\omega}$  and  $U_{2\omega}$  are the fundamental and second harmonic pulse energies, respectively,  $t_p$  is the incident laser's pulse full width at half-maximum duration assuming a Gaussian temporal profile. The refractive indices at the fundamental and second harmonic frequencies are  $n_{\omega}$  and  $n_{2\omega}$ , while  $L$  is the crystal thickness and  $z_R$  is the focused laser's Rayleigh length. The generalized space-time walk-off length,  $\ell_{st}$  defines the effective interaction length limited by spatial walk-off and group velocity dispersion,

$$\ell_{st} = \left[ \frac{\rho^2}{w_0^2} + \frac{\ln(2)(\alpha^2 + 16)\beta^2}{8t_p^2} \right]^{-1/2}. \quad (\text{S.2})$$

Here  $\rho$  is the spatial walk-off angle of the extraordinary ray,  $w_0$  the Gaussian beam waist radius, and  $\beta$  is the group velocity mismatch between the fundamental and second harmonic waves. The parameter  $\alpha$  represents the temporal chirp of the fundamental beam given by  $t_p = t_0 \sqrt{1 + \alpha^2}$  where  $t_0$  is the Fourier transform-limited pulse width.

In our microscope, the focusing objective has an effective focal length of 20 mm. With an incident full-width half-maximum fundamental beam spatial width of 3mm, we estimate that the focused beam waist at approximately  $w_0 = 2 \mu\text{m}$ , resulting in a Rayleigh length of approximately  $26 \mu\text{m}$ . The transform limit pulse width of the fundamental beam is 85 fs. Despite precompensation, the beam broadens to roughly 100 fs at the objective focus, yielding a chirp parameter  $\alpha \approx 0.62$ . For type I phase matching at the fundamental wave of 800nm the spatial walk-off angle  $\rho$  is 68 milliradians.<sup>2</sup> From these parameters, we estimate the generalized space-time walk-off length is,  $\ell_{st} \approx 30 \mu\text{m}$ .

Second harmonic generation from the Boc-*p*NPhe*p*NPhe crystal differs significantly as the estimated crystal thickness is only 0.5  $\mu\text{m}$ , smaller than the incident wavelength. Since phase matching and spatial walk-off are negligible over this length scale, the second harmonic generation efficiency for the Boc-*p*NPhe*p*NPhe crystal can be described using the standard plane-wave approximation,

$$\epsilon = \frac{[2\omega d_{eff}]^2}{n_\omega n_{2\omega} \lambda_0 c^3 \epsilon_0} \sqrt{\frac{2 \ln 2}{\pi}} \frac{U_\omega L^2}{2z_R t_p}. \quad (\text{S.3})$$

Taking the ratio between  $U_{2\omega}^{xtal}$  and  $U_{2\omega}^{BBO}$  allows us to estimate the effective nonlinear susceptibility for the Boc-*p*NPhe*p*NPhe crystal

$$d_{eff}^{xtal} \approx d_{eff}^{BBO} \pi^{3/4} \left( \frac{U_\omega^{BBO}}{U_\omega^{xtal}} \right) \sqrt{\frac{U_{2\omega}^{xtal}}{U_{2\omega}^{BBO}}} \sqrt{\frac{z_R^2 \ell_{S-T}^{BBO}}{L_{xtal}}}. \quad (\text{S.4})$$

In deriving this equation, we have neglected small differences in the refractive indices for the BBO and Boc-*p*NPhe*p*NPhe crystals. For the BBO crystal, an average incident power of 0.5 mWatts and an integration time of 2.5 ms yielded a maximum acquired signal of  $S_{2\omega}^{BBO} \approx 2.4 \times 10^6$  counts. These ‘‘counts’’ correspond to the number of photoelectrons excited by the second harmonic light integrated over the second harmonic spectrum during a time window equal to the ‘‘integration time’’. Comparatively, the maximum observed signal for the Boc-*p*NPhe*p*NPhe crystal at normal incidence, using an average incident power of 5 mW and a 250 ms integration time, was  $S_{2\omega}^{xtal} \approx 1.6 \times 10^5$  counts. Using the established effective nonlinear susceptibility for BBO<sup>2</sup>,  $d_{eff}^{BBO} = 2.0 \text{ pm/V}$ , and recognizing that the acquired second harmonic signals are proportional to  $S_{2\omega} \sim U_{2\omega} \tau$  with  $\tau$  being the detector integration time we estimate that the effective second-order nonlinear susceptibility for the Boc-*p*NPhe*p*NPhe crystals is  $0.67 \text{ pm/V}$ . Given that these measurements were conducted at normal incidence without angle optimization, this value represents a lower bound estimate of the material's nonlinear optical response.

## References

1. H. Wang and A. M. Weiner, *IEEE J. Quantum Elect.*, 2003, **39**, 1600-1618.
2. SNLO nonlinear optics code available from A. V. Smith, AS-Photonics, Albuquerque, New Mexico, U.S.A.
